# Supplementary material for: Effect of Probiotic Bifidobacterium bifidum TMC3115 Supplementation on Psychosocial Stress Using a Sub-Chronic and Mild Social Defeat Stress in Mice
Source: MDPI journal article supplement (doi:10.3390/nu14050970), 2022-02-24
Supplement: s1 [file s1]

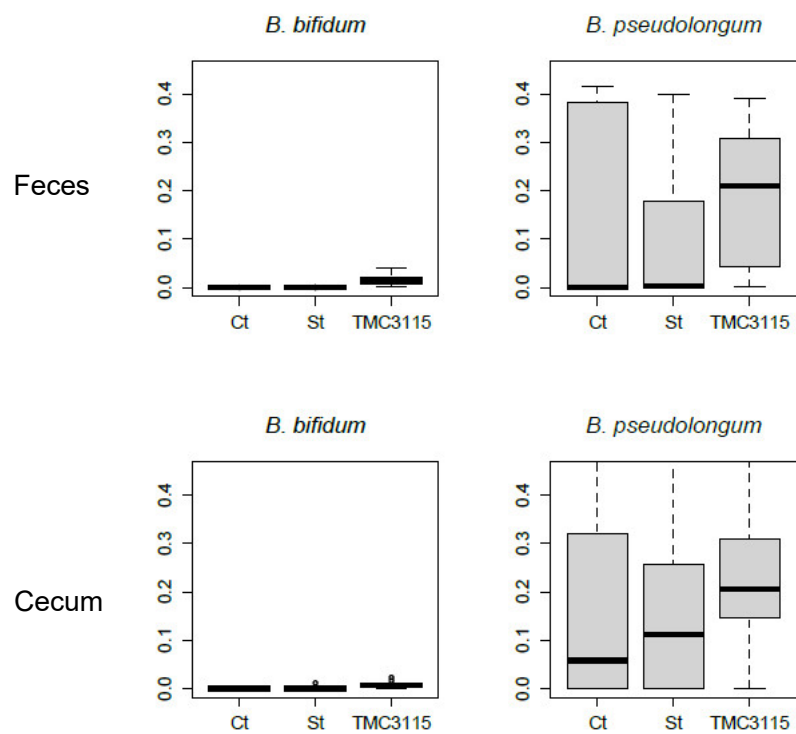

**Figure S1.** Analysis of bifidobacteria at the species level.

**Table S1.** Composition of FG medium.

| Ingredients                   | g/L  |
|-------------------------------|------|
| Glucose                       | 20.0 |
| Peptone                       | 20.0 |
| Yeast Extract                 | 5.0  |
| Sodium acetate                | 5.0  |
| Diammonium hydrogenphosphate  | 2.0  |
| Dipotassium Hydrogenphosphate | 2.0  |
| Magnesium sulfate             | 0.5  |
| Polysorbate 80                | 0.1  |

**Table S2.** Ingredients and nutrients of AIN-93G.

| Ingredients (%)              |       | Nutrients (%)         |       |
|------------------------------|-------|-----------------------|-------|
| Casein                       | 20.0  | Protein               | 17.9  |
| L-Cystein                    | 0.3   | Fat                   | 7.0   |
| Corn starch                  | 52.9  | Ash                   | 2.5   |
| Sucrose                      | 10.0  | Fiber                 | 3.0   |
| Soy oil                      | 7.0   | Nitrogen free extract | 60.6  |
| Cellulose powder             | 5.0   |                       |       |
| AIN-93 mineral mix           | 3.5   |                       |       |
| AIN-93 vitamin mix           | 1.0   |                       |       |
| Choline bitartrate           | 0.25  |                       |       |
| Thertairy butyl hydroquinone | 0.001 |                       |       |
| Total                        | 100.0 | Calorie (kcal/100 g)  | 377.0 |

Data from Oriental Yeast, Tokyo, Japan.

**Table S3.** Correlation between the inflammatory cytokines and cecum microbiota.

|                                | correlation coefficient ( $r_s$ ) |               |
|--------------------------------|-----------------------------------|---------------|
|                                | IL-6*                             | TNF- $\alpha$ |
| <Phylum>                       |                                   |               |
| <i>Actinobacteria</i>          | -0.048 (0.041)                    | 0.082         |
| <i>Bacteroidetes</i>           | -0.037 (0.095)                    | -0.134        |
| <i>Deferribacteres</i>         | -0.114 (0.096)                    | 0.209         |
| <i>Firmicutes</i>              | -0.091 (-0.275)                   | -0.237        |
| <i>Proteobacteria</i>          | 0.197 (0.453)                     | 0.492         |
| <Genus>                        |                                   |               |
| <i>Bifidobacterium</i>         | -0.042 (0.047)                    | 0.081         |
| <i>Adlercreutzia</i>           | -0.047 (0.031)                    | 0.097         |
| <i>Bacteroides</i>             | -0.132 (0.012)                    | -0.303        |
| <i>Mucispirillum</i>           | -0.114 (0.096)                    | 0.209         |
| <i>Bilophila</i>               | 0.039 (0.132)                     | 0.228         |
| <i>[f]_Desulfovibrionaceae</i> | 0.193 (0.354)                     | 0.499         |
| <i>Desulfovibrio</i>           | 0.184 (0.505)                     | 0.530         |

Analyzed using Spearman's rank correlation.

\*The numbers in parentheses are the correlation coefficients when the TMC3115 group is excluded.
